# Supplementary material for: Modulation of occluding junctions alters the hematopoietic niche to trigger immune activation
Source: eLife. 2017 Aug 25;6:e28081. doi: 10.7554/eLife.28081 (PMC5597334; doi:10.7554/eLife.28081)
Supplement: Figure 1—source data 1. [file elife-28081-fig1-data1.xls]

## Sheet: Sheet1
		Pearsons coloc coefficient upon SJ knockdown
			PSC cells
		w1118;collier-Gal4	CoraRNAi	Nrx4RNAi
		0.07	0.6	0.49
		0.09	0.65	0.8
		0.1	0.45	0.85			w1118;collier-gal4	CoraRNAi	Nrx4RNAi
		0.075	0.48	0.55			0.1105	0.607	0.701				×
		0.15	0.71	0.67
		0.08	0.68	0.8
		0.18	0.77	0.9
		0.12	0.74	0.63
		0.08	0.48	0.59
		0.16	0.51	0.73
	Mean	0.1105	0.607	0.701
	sd	0.0397527	0.119448	0.136581
	Control	0.07	0.09	0.1	0.075	0.15	0.08	0.18	0.12	0.08	0.16
	CoraRNAi	0.6	0.65	0.45	0.48	0.71	0.68	0.77	0.74	0.48	0.51
	Nrx4RNAi	0.49	0.8	0.85	0.55	0.67	0.8	0.9	0.63	0.59	0.73
							t-Test: Two-Sample Assuming Unequal Variances
t-Test: Two-Sample Assuming Unequal Variances
								Variable 1	Variable 2
	Variable 1	Variable 2					Mean	0.1105	0.701
Mean	0.1105	0.607					Variance	0.00158028	0.0186544
Variance	0.00158028	0.0142678					Observations	10	10
Observations	10	10					Hypothesized Mean Difference	0
Hypothesized Mean Difference	0						df	11
df	11						t Stat	-13.1272
t Stat	-12.4719						P(T<=t) one-tail	2.2996e-08
P(T<=t) one-tail	3.90896e-08						t Critical one-tail	1.79588
t Critical one-tail	1.79588						P(T<=t) two-tail	4.59921e-08
P(T<=t) two-tail	7.81792e-08						t Critical two-tail	2.20099
t Critical two-tail	2.20099
