# Supplementary material for: Modulation of occluding junctions alters the hematopoietic niche to trigger immune activation
Source: eLife. 2017 Aug 25;6:e28081. doi: 10.7554/eLife.28081 (PMC5597334; doi:10.7554/eLife.28081)
Supplement: Figure 1—source data 2. [file elife-28081-fig1-data2.xls]

## Sheet: Sheet2
		Pearsons coloc coeff upon SJ knockdown
		Non niche cells
		Control	CoraRNAi	NrxIVRNAi
		0.45	0.5	0.55
		0.66	0.69	0.71			w1118; collier-gal4	CoraRNAi	NrxIVRNAi
		0.59	0.48	0.85			0.605	0.663	0.655
		0.85	0.81	0.9
		0.79	0.92	0.63
		0.65	0.51	0.83
		0.48	0.78	0.39
		0.38	0.54	0.49
		0.73	0.57	0.45
		0.47	0.83	0.75
	mean	0.605	0.663	0.655
	sd	0.157639	0.162347	0.180077
	0.45	0.66	0.59	0.85	0.79	0.65	0.48	0.38	0.73	0.47
	0.5	0.69	0.48	0.81	0.92	0.51	0.78	0.54	0.57	0.83
	0.55	0.71	0.85	0.9	0.63	0.83	0.39	0.49	0.45	0.75
t-Test: Two-Sample Assuming Unequal Variances							t-Test: Two-Sample Assuming Unequal Variances
	Variable 1	Variable 2						Variable 1	Variable 2
Mean	0.605	0.663					Mean	0.605	0.655
Variance	0.02485	0.0263567					Variance	0.02485	0.0324278
Observations	10	10					Observations	10	10
Hypothesized Mean Difference	0						Hypothesized Mean Difference	0
df	18						df	18
t Stat	-0.810522						t Stat	-0.660658
P(T<=t) one-tail	0.214114						P(T<=t) one-tail	0.258599
t Critical one-tail	1.73406						t Critical one-tail	1.73406
P(T<=t) two-tail	0.428227						P(T<=t) two-tail	0.517198
t Critical two-tail	2.10092						t Critical two-tail	2.10092
