# Supplementary material for: Modulation of occluding junctions alters the hematopoietic niche to trigger immune activation
Source: eLife. 2017 Aug 25;6:e28081. doi: 10.7554/eLife.28081 (PMC5597334; doi:10.7554/eLife.28081)
Supplement: Figure 2—source data 1. [file elife-28081-fig2-data1.xls]

## Sheet: Sheet1
	Plasmatocyte differentiation upon SJ knockdown and in SJ and associated mutants
	PcolGFP	Corarnai	NrxIVrnai	w1118	cora2/Cyo	cora4/Cyo	cora5/Cyo	cora14/Cyo	cora2/cora14	cora5/cora14	Nrx4304	ATPαDTS1R2	sinunwu7	kuneC309	McrEY07421
	3.1	9.9	5.8	1.9	17.4	14.5	9.2	15.59	29.17	21.4	8.74	14.36	14.68	17.46	6.9
	2.8	11.4	9.5	1.09	18.9	18.37	16.8	18.12	18.5	14.4	28.11	5.77	17.75	19.6	7.24
	3.2	10.7	14.16	1.3	18.7	13.7	22.7	19.01	13.03	26.42	32.9	29.74	6.08	19.28	13.27
	3.6	13.4	6.4	1.6	12.6	16.9	21	17.23	19.2	26.5	22.27	17.86	6.79	22.04	7.2
	2.4	14.6	3.7	1.2	15.03	12.42	20.94	18.06	23.11	20.86	25.29	16.64	11.35	27.04	15.07
	3.5	14.19	5.3	1.23	12.2	15.52	8.7	16.26	10.81	26.81	27.23	12.28	17.9	32.44	19.87
	1.8	12.5	11.3	0.9	22.9	14.9	6.8	19.48	16.4	16.98	14.48	12.11	10.19	11.67	24.11
	1.6	8.7	15.2	1.9	22.2	15.71	20.2	10.42	21.05	17.51	22.5	15.53	7.69	13.61	10.83
	1.6	8.5	14.75	0.5	22.4	9.2	23	5.9	22.4	14.23	26.5	15.74	24.54	8.57	18.37
	1.2	11.3	9.5	0.9	23.11	7.5	18.81	22.04	16.72	8.8	30	8.77	9.83	21.69	16.82
Mean	2.48	11.519	9.561	1.252	18.544	13.872	14.9	14.41	16.2	15.8	23.802	12.8	12.68	17.9	13.968
sem	0.278	0.6794	1.331	0.1417	1.323	1.062	1.964	1.494	1.67	1.927	2.307	2.025	1.876	2.248	1.879
	Gal4	coraRNAi	nrxIVRNAi	w1118	cora2/Cyo	cora4/Cyo	cora5/Cyo	cora14/Cyo	cora2/cora14	cora5/cora14	Nrx4304	ATPαDTS1R2	sinunwu7	kuneC309	McrEY07421
	2.48	11.51	9.56	1.25	18.54	13.872	14.9	14.4143	16.2	15.8	23.8	12.8	12.68	17.9	13.96
	3.1	2.8	3.2	3.6	2.4	3.5	1.8	1.6	1.6	1.2
	9.9	11.4	10.7	13.4	14.6	14.19	12.5	8.7	8.5	11.3
	5.8	9.5	14.16	6.4	3.7	5.3	11.3	15.2	14.75	9.5
	1.9	1.09	1.3	1.6	1.2	1.23	0.9	1.9	0.5	0.9
	17.4	18.9	18.7	12.6	15.03	12.2	22.9	22.2	22.4	23.11
	14.5	18.37	13.7	16.9	12.42	15.52	14.9	15.71	9.2	7.5
	9.2	16.8	22.7	21	20.94	8.7	6.8	20.2	23	18.81
	15.59	18.12	19.01	17.23	18.06	16.26	19.48	10.42	5.9	22.04
	29.17	18.5	13.03	19.2	23.11	10.81	16.4	21.05	22.4	16.72
	21.4	14.4	26.42	26.5	20.86	26.81	16.98	17.51	14.23	8.8
	8.74	28.11	32.9	22.27	25.29	27.23	14.48	22.5	26.5	30
	14.36	5.77	29.74	17.86	16.64	12.28	12.11	15.53	15.74	8.77
	14.68	17.75	6.08	6.79	11.35	17.9	10.19	7.69	24.54	9.83
	17.46	19.6	19.28	22.04	27.04	32.44	11.67	13.61	8.57	21.69
	6.9	7.24	13.27	7.2	15.07	19.87	24.11	10.83	18.37	16.82
t-Test: Two-Sample Assuming Unequal Variances					t-Test: Two-Sample Assuming Unequal Variances						t-Test: Two-Sample Assuming Unequal Variances					t-Test: Two-Sample Assuming Unequal Variances
	Variable 1	Variable 2				Variable 1	Variable 2					Variable 1	Variable 2				Variable 1	Variable 2
Mean	2.48	11.519			Mean	2.48	9.561				Mean	1.252	18.544			Mean	1.252	13.872
Variance	0.772889	4.61583			Variance	0.772889	17.7279				Variance	0.200662	17.4937			Variance	0.200662	11.2793
Observations	10	10			Observations	10	10				Observations	10	10			Observations	10	10
Hypothesized Mean Difference	0				Hypothesized Mean Difference	0					Hypothesized Mean Difference	0				Hypothesized Mean Difference	0
df	12				df	10					df	9				df	9
t Stat	-12.3134				t Stat	-5.20595					t Stat	-12.9995				t Stat	-11.7785
P(T<=t) one-tail	1.81331e-08				P(T<=t) one-tail	0.000198932					P(T<=t) one-tail	1.94211e-07				P(T<=t) one-tail	4.5115e-07
t Critical one-tail	1.78229				t Critical one-tail	1.81246					t Critical one-tail	1.83311				t Critical one-tail	1.83311
P(T<=t) two-tail	3.62663e-08				P(T<=t) two-tail	0.000397863					P(T<=t) two-tail	3.88421e-07				P(T<=t) two-tail	9.023e-07
t Critical two-tail	2.17881				t Critical two-tail	2.22814					t Critical two-tail	2.26216				t Critical two-tail	2.26216
t-Test: Two-Sample Assuming Unequal Variances					t-Test: Two-Sample Assuming Unequal Variances					t-Test: Two-Sample Assuming Unequal Variances					t-Test: Two-Sample Assuming Unequal Variances
	Variable 1	Variable 2				Variable 1	Variable 2				Variable 1	Variable 2				Variable 1	Variable 2
Mean	1.252	16.815			Mean	1.252	16.211			Mean	1.252	19.039			Mean	1.252	19.391
Variance	0.200662	38.5553			Variance	0.200662	22.3155			Variance	0.200662	27.8926			Variance	0.200662	37.1385
Observations	10	10			Observations	10	10			Observations	10	10			Observations	10	10
Hypothesized Mean Difference	0				Hypothesized Mean Difference	0				Hypothesized Mean Difference	0				Hypothesized Mean Difference	0
df	9				df	9				df	9				df	9
t Stat	-7.90541				t Stat	-9.96908				t Stat	-10.6121				t Stat	-9.38709
P(T<=t) one-tail	1.21692e-05				P(T<=t) one-tail	1.83583e-06				P(T<=t) one-tail	1.08882e-06				P(T<=t) one-tail	3.02108e-06
t Critical one-tail	1.83311				t Critical one-tail	1.83311				t Critical one-tail	1.83311				t Critical one-tail	1.83311
P(T<=t) two-tail	2.43384e-05				P(T<=t) two-tail	3.67166e-06				P(T<=t) two-tail	2.17765e-06				P(T<=t) two-tail	6.04216e-06
t Critical two-tail	2.26216				t Critical two-tail	2.26216				t Critical two-tail	2.26216				t Critical two-tail	2.26216
t-Test: Two-Sample Assuming Unequal Variances					t-Test: Two-Sample Assuming Unequal Variances					t-Test: Two-Sample Assuming Unequal Variances						t-Test: Two-Sample Assuming Unequal Variances
	Variable 1	Variable 2				Variable 1	Variable 2				Variable 1	Variable 2					Variable 1	Variable 2
Mean	1.252	23.802			Mean	1.252	14.88			Mean	1.252	12.68				Mean	1.252	19.34
Variance	0.200662	53.1998			Variance	0.200662	40.9986			Variance	0.200662	35.2063				Variance	0.200662	50.5525
Observations	10	10			Observations	10	10			Observations	10	10				Observations	10	10
Hypothesized Mean Difference	0				Hypothesized Mean Difference	0				Hypothesized Mean Difference	0					Hypothesized Mean Difference	0
df	9				df	9				df	9					df	9
t Stat	-9.7583				t Stat	-6.7141				t Stat	-6.07332					t Stat	-8.02895
P(T<=t) one-tail	2.19241e-06				P(T<=t) one-tail	4.35641e-05				P(T<=t) one-tail	9.25756e-05					P(T<=t) one-tail	1.07524e-05
t Critical one-tail	1.83311				t Critical one-tail	1.83311				t Critical one-tail	1.83311					t Critical one-tail	1.83311
P(T<=t) two-tail	4.38481e-06				P(T<=t) two-tail	8.71281e-05				P(T<=t) two-tail	0.000185151					P(T<=t) two-tail	2.15049e-05
t Critical two-tail	2.26216				t Critical two-tail	2.26216				t Critical two-tail	2.26216					t Critical two-tail	2.26216
t-Test: Two-Sample Assuming Unequal Variances
	Variable 1	Variable 2
Mean	1.252	13.968
Variance	0.200662	35.3092
Observations	10	10
Hypothesized Mean Difference	0
df	9
t Stat	-6.74802
P(T<=t) one-tail	4.19184e-05
t Critical one-tail	1.83311
P(T<=t) two-tail	8.38368e-05
t Critical two-tail	2.26216
