# Supplementary material for: Modulation of occluding junctions alters the hematopoietic niche to trigger immune activation
Source: eLife. 2017 Aug 25;6:e28081. doi: 10.7554/eLife.28081 (PMC5597334; doi:10.7554/eLife.28081)
Supplement: Figure 2—source data 2. [file elife-28081-fig2-data2.xls]

## Sheet: Sheet1
	Crystal cell differentiation in SJ knockdown and associated mutants
	PcolGFP	Corarnai	NrxIVrnai	w1118	cora2/Cyo	cora4/Cyo	cora5/Cyo	cora14/Cyo	cora2/cora14	cora5/cora14	Nrx4304	ATPαDTS1R2	sinunwu7	kuneC309	McrEY07421
	0.7	11.6	2.29	0.1	2.4	0.3	6.9	6.06	9.6	10.12	4.92	3.63	10.85	5.44	3.26
	0.9	5.8	2.6	0.13	1.19	4.3	5.3	5.21	9.45	7.86	9.65	4.89	6.41	12.65	4.08
	0.9	4.5	3.2	0.3	2.7	4.53	7.5	15.85	8.79	12.99	4.26	2.79	11.21	5.21	6.1
	0.4	9.6	4.2	0.7	5.07	0.7	11.1	9.04	7.7	9.32	4.85	3.12	10.48	12.29	7.3
	0.6	9.6	9.2	0.6	3.22	0.8	2.9	10.28	7.31	7.74	9.27	1.83	10.56	9.82	5.17
	0.6	6.8	3.8	0.23	2.14	1.48	9.36	5.23	8.33	11.25	8.87	1.64	8.12	6.58	6.94
	0.2	4.6	4.5	0.3	4.26	2.01	9.71	8.76	8.89	9.48	7.24	9.08	5.34	11.21	5.31
	0.7	12.2	5.1	0.44	1.36	0.9	6.84	7.99	9.25	7.47	7.46	7.25	7.58	8.97	4.65
	0.5	8.3	4.1	0.24	1.89	1.39	7.41	8.89	10.61	8.56	6.44	5.58	7.89	7.93	6.4
	0.5	7.9	3.7	0.35	3.76	1.67	6.93	9.32	10.37	11.29	7.17	7.27	11.43	7.27	7.8
Mean	0.6	8.09	4.269	0.339	2.799	1.808	7.395	8.663	9.03	9.608	7.013	4.708	8.987	8.737	5.701
sem	0.06831	0.8552	0.6099	0.06095	0.4011	0.4631	0.7327	0.9766	0.3356	0.5729	0.6031	0.8027	0.6909	0.8566	0.4627
	Gal4	coraRNAi	nrxIVRNAi	w1118	cora2/Cyo	cora4/Cyo	cora5/Cyo	cora14/Cyo	cora2/cora14	cora5/cora14	Nrx4304	ATPαDTS1R2	sinunwu7	kuneC309	McrEY07421
	0.6	8.09	4.26	0.339	2.799	1.808	7.395	8.663	9.03	9.608	7.013	4.708	8.987	8.737	5.701
	0.7	0.9	0.9	0.4	0.6	0.6	0.2	0.7	0.5	0.5
	11.6	5.8	4.5	9.6	9.6	6.8	4.6	12.2	8.3	7.9
	2.29	2.6	3.2	4.2	9.2	3.8	4.5	5.1	4.1	3.7
	0.1	0.13	0.3	0.7	0.6	0.23	0.3	0.44	0.24	0.35
	2.4	1.19	2.7	5.07	3.22	2.14	4.26	1.36	1.89	3.76
	0.3	4.3	4.53	0.7	0.8	1.48	2.01	0.9	1.39	1.67
	6.9	5.3	7.5	11.1	2.9	9.36	9.71	6.84	7.41	6.93
	6.06	5.21	15.85	9.04	10.28	5.23	8.76	7.99	8.89	9.32
	9.6	9.45	8.79	7.7	7.31	8.33	8.89	9.25	10.61	10.37
	10.12	7.86	12.99	9.32	7.74	11.25	9.48	7.47	8.56	11.29
	4.92	9.65	4.26	4.85	9.27	8.87	7.24	7.46	6.44	7.17
	3.63	4.89	2.79	3.12	1.83	1.64	9.08	7.25	5.58	7.27
	10.85	6.41	11.21	10.48	10.56	8.12	5.34	7.58	7.89	11.43
	5.44	12.65	5.21	12.29	9.82	6.58	11.21	8.97	7.93	7.27
	3.26	4.08	6.1	7.3	5.17	6.94	5.31	4.65	6.4	7.8
t-Test: Two-Sample Assuming Unequal Variances					t-Test: Two-Sample Assuming Unequal Variances					t-Test: Two-Sample Assuming Unequal Variances					t-Test: Two-Sample Assuming Unequal Variances
	Variable 1	Variable 2				Variable 1	Variable 2				Variable 1	Variable 2				Variable 1	Variable 2
Mean	0.6	8.09			Mean	0.6	4.269			Mean	0.339	2.799			Mean	0.339	1.808
Variance	0.0466667	7.31433			Variance	0.0466667	3.72005			Variance	0.0371433	1.6091			Variance	0.0371433	2.14486
Observations	10	10			Observations	10	10			Observations	10	10			Observations	10	10
Hypothesized Mean Difference	0				Hypothesized Mean Difference	0				Hypothesized Mean Difference	0				Hypothesized Mean Difference	0
df	9				df	9				df	9				df	9
t Stat	-8.72998				t Stat	-5.97814				t Stat	-6.06301				t Stat	-3.14481
P(T<=t) one-tail	5.47328e-06				P(T<=t) one-tail	0.000104004				P(T<=t) one-tail	9.37447e-05				P(T<=t) one-tail	0.00591804
t Critical one-tail	1.83311				t Critical one-tail	1.83311				t Critical one-tail	1.83311				t Critical one-tail	1.83311
P(T<=t) two-tail	1.09466e-05				P(T<=t) two-tail	0.000208008				P(T<=t) two-tail	0.000187489				P(T<=t) two-tail	0.0118361
t Critical two-tail	2.26216				t Critical two-tail	2.26216				t Critical two-tail	2.26216				t Critical two-tail	2.26216
t-Test: Two-Sample Assuming Unequal Variances					t-Test: Two-Sample Assuming Unequal Variances					t-Test: Two-Sample Assuming Unequal Variances
	Variable 1	Variable 2				Variable 1	Variable 2				Variable 1	Variable 2
Mean	0.339	7.395			Mean	0.339	8.663			Mean	0.339	9.03
Variance	0.0371433	5.36912			Variance	0.0371433	9.53773			Variance	0.0371433	1.12624
Observations	10	10			Observations	10	10			Observations	10	10
Hypothesized Mean Difference	0				Hypothesized Mean Difference	0				Hypothesized Mean Difference	0
df	9				df	9				df	10
t Stat	-9.59644				t Stat	-8.50678				t Stat	-25.4805
P(T<=t) one-tail	2.51814e-06				P(T<=t) one-tail	6.75329e-06				P(T<=t) one-tail	9.94416e-11
t Critical one-tail	1.83311				t Critical one-tail	1.83311				t Critical one-tail	1.81246
P(T<=t) two-tail	5.03627e-06				P(T<=t) two-tail	1.35066e-05				P(T<=t) two-tail	1.98883e-10
t Critical two-tail	2.26216				t Critical two-tail	2.26216				t Critical two-tail	2.22814
t-Test: Two-Sample Assuming Unequal Variances					t-Test: Two-Sample Assuming Unequal Variances						t-Test: Two-Sample Assuming Unequal Variances
	Variable 1	Variable 2				Variable 1	Variable 2					Variable 1	Variable 2
Mean	0.339	9.03			Mean	0.339	9.608				Mean	0.339	7.013
Variance	0.0371433	1.12624			Variance	0.0371433	3.28211				Variance	0.0371433	3.63765
Observations	10	10			Observations	10	10				Observations	10	10
Hypothesized Mean Difference	0				Hypothesized Mean Difference	0					Hypothesized Mean Difference	0
df	10				df	9					df	9
t Stat	-25.4805				t Stat	-16.0884					t Stat	-11.0096
P(T<=t) one-tail	9.94416e-11				P(T<=t) one-tail	3.06538e-08					P(T<=t) one-tail	7.9909e-07
t Critical one-tail	1.81246				t Critical one-tail	1.83311					t Critical one-tail	1.83311
P(T<=t) two-tail	1.98883e-10				P(T<=t) two-tail	6.13075e-08					P(T<=t) two-tail	1.59818e-06
t Critical two-tail	2.22814				t Critical two-tail	2.26216					t Critical two-tail	2.26216
t-Test: Two-Sample Assuming Unequal Variances					t-Test: Two-Sample Assuming Unequal Variances					t-Test: Two-Sample Assuming Unequal Variances					t-Test: Two-Sample Assuming Unequal Variances
	Variable 1	Variable 2				Variable 1	Variable 2				Variable 1	Variable 2				Variable 1	Variable 2
Mean	0.339	4.708			Mean	0.339	4.708			Mean	0.339	8.987			Mean	0.339	8.737
Variance	0.0371433	6.44351			Variance	0.0371433	6.44351			Variance	0.0371433	4.77338			Variance	0.0371433	7.33825
Observations	10	10			Observations	10	10			Observations	10	10			Observations	10	10
Hypothesized Mean Difference	0				Hypothesized Mean Difference	0				Hypothesized Mean Difference	0				Hypothesized Mean Difference	0
df	9				df	9				df	9				df	9
t Stat	-5.42716				t Stat	-5.42716				t Stat	-12.4687				t Stat	-9.77875
P(T<=t) one-tail	0.000208958				P(T<=t) one-tail	0.000208958				P(T<=t) one-tail	2.77614e-07				P(T<=t) one-tail	2.15466e-06
t Critical one-tail	1.83311				t Critical one-tail	1.83311				t Critical one-tail	1.83311				t Critical one-tail	1.83311
P(T<=t) two-tail	0.000417915				P(T<=t) two-tail	0.000417915				P(T<=t) two-tail	5.55228e-07				P(T<=t) two-tail	4.30933e-06
t Critical two-tail	2.26216				t Critical two-tail	2.26216				t Critical two-tail	2.26216				t Critical two-tail	2.26216
t-Test: Two-Sample Assuming Unequal Variances
	Variable 1	Variable 2
Mean	0.339	5.701
Variance	0.0371433	2.14123
Observations	10	10
Hypothesized Mean Difference	0
df	9
t Stat	-11.4884
P(T<=t) one-tail	5.57499e-07
t Critical one-tail	1.83311
P(T<=t) two-tail	1.115e-06
t Critical two-tail	2.26216
