# Supplementary material for: Modulation of occluding junctions alters the hematopoietic niche to trigger immune activation
Source: eLife. 2017 Aug 25;6:e28081. doi: 10.7554/eLife.28081 (PMC5597334; doi:10.7554/eLife.28081)
Supplement: Figure 3—source data 1. [file elife-28081-fig3-data1.xls]

## Sheet: Sheet1
	Plasmatocyte counts upon SJ over-expression
	PcolGFP	coraov	NrxIVov
	2.07	0.93	0
	1.12	1.57
	2.91	1.67
	1.18	2.15
	2.104	1.48
	1.62	2.83
	1.92	1.38
	1.87	1.41
	2.8	1.15
	2.3	1.52
Mean	1.9894	1.609					w1118; collier-gal4>UAS-GFP	collier-gal4>UAS-myc-cora1-1698	collier-gal4>UAS-myc-NrxIV
sd	0.564552	0.50765					1.989	1.609	0
		2.07	1.12	2.91	1.18	2.104	1.62	1.92	1.87	2.8	2.3
		0.93	1.57	1.67	2.15	1.48	2.83	1.38	1.41	1.15	1.52
	t-Test: Two-Sample Assuming Unequal Variances
		Variable 1	Variable 2
	Mean	1.9894	1.609
	Variance	0.354132	0.286343
	Observations	10	10
	Hypothesized Mean Difference	0
	df	18
	t Stat	1.5031
	P(T<=t) one-tail	0.0750772
	t Critical one-tail	1.73406
	P(T<=t) two-tail	0.150154
	t Critical two-tail	2.10092
