# Supplementary material for: Modulation of occluding junctions alters the hematopoietic niche to trigger immune activation
Source: eLife. 2017 Aug 25;6:e28081. doi: 10.7554/eLife.28081 (PMC5597334; doi:10.7554/eLife.28081)
Supplement: Figure 3—source data 2. [file elife-28081-fig3-data2.xls]

## Sheet: Sheet2
	Crystal cell differentiation upon SJ over-expression
	PcolGFP	coraov	NrxIVov
	0.85	1.13	1.88
	0.67	0.48	1.404
	1.5	2.22	1.6
	1.02	1.901	1.94
	2.24	1.36	1.675
	2.77	0.751	1.51
	1.27	2.76	0.98
	0.92	1.18	1.25
	1.45	0.97	1.48
	1.88	1.23	1.13
Mean	1.457	1.3982	1.4849
SD	0.668332	0.697398	0.7234			w1118; collier-Gal4>UAS-GFP	collier-Gal4>UAS-myc-cora1-1698	collier-gal4>UAS-myc-NrxIV
						1.457	1.398	1.484
		0.85	0.67	1.5	1.02	2.24	2.77	1.27	0.92	1.45	1.88
		1.13	0.48	2.22	1.901	1.36	0.751	2.76	1.18	0.97	1.23
		1.88	1.404	1.6	1.94	1.675	1.51	0.98	1.25	1.48	1.13
								t-Test: Two-Sample Assuming Unequal Variances
t-Test: Two-Sample Assuming Unequal Variances
									Variable 1	Variable 2
	Variable 1	Variable 2						Mean	1.457	1.4849
Mean	1.457	1.3982						Variance	0.446668	0.0950957
Variance	0.446668	0.486363						Observations	10	10
Observations	10	10						Hypothesized Mean Difference	0
Hypothesized Mean Difference	0							df	13
df	18							t Stat	-0.119867
t Stat	0.192499							P(T<=t) one-tail	0.453211
P(T<=t) one-tail	0.424753							t Critical one-tail	1.77093
t Critical one-tail	1.73406							P(T<=t) two-tail	0.906421
P(T<=t) two-tail	0.849506							t Critical two-tail	2.16037
t Critical two-tail	2.10092
