# Supplementary material for: Modulation of occluding junctions alters the hematopoietic niche to trigger immune activation
Source: eLife. 2017 Aug 25;6:e28081. doi: 10.7554/eLife.28081 (PMC5597334; doi:10.7554/eLife.28081)
Supplement: Figure 4—source data 1. [file elife-28081-fig4-data1.xls]

## Sheet: Sheet1
	Pearson's coefficient (Dye assay upon infection) Dual dye assay
	Niche
	w1118	B.sub	E.coli
	0.12	0.78	0.842
	0.095	0.81	0.75
	0.148	0.675	0.71
	0.068	0.64	0.68
	0.13	0.798	0.725
	0.087	0.86	0.634
	0.15	0.834	0.645
	0.13	0.81	0.69
	0.11	0.786	0.715
	0.102	0.761	0.722
	0.114	0.7754	0.7113			w1118	B.sub	E.coli
sd	0.0265957	0.0685163	0.0584067			0.114	0.7754	0.7113
sem	0.00841	0.02167	0.01847
	0.12	0.095	0.148	0.068	0.13	0.087	0.15	0.13	0.11	0.102
	0.78	0.81	0.675	0.64	0.798	0.86	0.834	0.81	0.786	0.761
	0.842	0.75	0.71	0.68	0.725	0.634	0.645	0.69	0.715	0.722
t-Test: Two-Sample Assuming Unequal Variances						t-Test: Two-Sample Assuming Unequal Variances
	Variable 1	Variable 2					Variable 1	Variable 2
Mean	0.114	0.7754				Mean	0.114	0.7113
Variance	0.000707333	0.00469449				Variance	0.000707333	0.00341134
Observations	10	10				Observations	10	10
Hypothesized Mean Difference	0					Hypothesized Mean Difference	0
df	12					df	13
t Stat	-28.4573					t Stat	-29.4316
P(T<=t) one-tail	1.10014e-12					P(T<=t) one-tail	1.38803e-13
t Critical one-tail	1.78229					t Critical one-tail	1.77093
P(T<=t) two-tail	2.20028e-12					P(T<=t) two-tail	2.77607e-13
t Critical two-tail	2.17881					t Critical two-tail	2.16037
