# Supplementary material for: Modulation of occluding junctions alters the hematopoietic niche to trigger immune activation
Source: eLife. 2017 Aug 25;6:e28081. doi: 10.7554/eLife.28081 (PMC5597334; doi:10.7554/eLife.28081)
Supplement: Figure 4—source data 2. [file elife-28081-fig4-data2.xls]

## Sheet: Sheet1
	Non niche	(Pearsons coefficient) dual dye assay upon infection
	w1118	B.sub	E.coli
	0.67	0.82	0.85
	0.71	0.74	0.766
	0.645	0.723	0.808
	0.714	0.677	0.79
	0.726	0.652	0.73
	0.711	0.83	0.678
	0.704	0.79	0.715
	0.678	0.756	0.752
	0.76	0.732	0.798
	0.778	0.725	0.823
Mean	0.7096	0.7445	0.771				w1118	B.sub	E.coli
sd	0.0398335	0.0571008	0.0529738				0.709	0.744	0.771
sem	0.0126	0.01806	0.01675
	0.67	0.71	0.645	0.714	0.726	0.711	0.704	0.678	0.76
	0.82	0.74	0.723	0.677	0.652	0.83	0.79	0.756	0.732
	0.85	0.766	0.808	0.79	0.73	0.678	0.715	0.752	0.798
	t-Test: Two-Sample Assuming Unequal Variances
		Variable 1	Variable 2
	Mean	0.7096	0.7445
	Variance	0.00158671	0.0032605
	Observations	10	10
	Hypothesized Mean Difference	0
	df	16
	t Stat	-1.58518
	P(T<=t) one-tail	0.0662441
	t Critical one-tail	1.74588
	P(T<=t) two-tail	0.132488
	t Critical two-tail	2.11991
	t-Test: Two-Sample Assuming Unequal Variances
		Variable 1	Variable 2
	Mean	0.7096	0.771
	Variance	0.00158671	0.00280622
	Observations	10	10
	Hypothesized Mean Difference	0
	df	17
	t Stat	-2.92948
	P(T<=t) one-tail	0.00467929
	t Critical one-tail	1.73961
	P(T<=t) two-tail	0.00935858
	t Critical two-tail	2.10982
