# Supplementary material for: Modulation of occluding junctions alters the hematopoietic niche to trigger immune activation
Source: eLife. 2017 Aug 25;6:e28081. doi: 10.7554/eLife.28081 (PMC5597334; doi:10.7554/eLife.28081)
Supplement: Figure 4—source data 3. [file elife-28081-fig4-data3.xls]

## Sheet: Sheet1
	Plasmatocyte differentiation upon infection
				plasmatocyte differentiation index			(upon infection)
		Pcol85Gal4	B.subtilis	E.coli
		2.7	10.9	17.06
		3.3	8.4	15.47
		2.8	17.6	9.54
		3.6	18.05	10.86
		3.4	13.47	12.08
		1.5	7.92	14.15				Sucrose	B.subtilis	E.coli
		1.7	7.01	13.23				2.51	10.13	10.88
		1.89	5.75	5.52
		2.6	5.19	5.69
		1.7	7.01	5.29
	Mean	2.519	10.13	10.889
	sd	0.778067	4.72828	4.28984
	sem	0.246	1.495	1.357
	2.7	3.3	2.8	3.6	3.4	1.5	1.7	1.89	2.6	1.7
	10.9	8.4	17.6	18.05	13.47	7.92	7.01	5.75	5.19	7.01
	17.06	15.47	9.54	10.86	12.08	14.15	13.23	5.52	5.69	5.29
t-Test: Two-Sample Assuming Unequal Variances							t-Test: Two-Sample Assuming Unequal Variances
	Variable 1	Variable 2						Variable 1	Variable 2
Mean	2.519	10.13					Mean	2.519	10.889
Variance	0.605388	22.3566					Variance	0.605388	18.4028
Observations	10	10					Observations	10	10
Hypothesized Mean Difference	0						Hypothesized Mean Difference	0
df	9						df	10
t Stat	-5.02269						t Stat	-6.07093
P(T<=t) one-tail	0.000358228						P(T<=t) one-tail	6.0113e-05
t Critical one-tail	1.83311						t Critical one-tail	1.81246
P(T<=t) two-tail	0.000716456						P(T<=t) two-tail	0.000120226
t Critical two-tail	2.26216						t Critical two-tail	2.22814
