# Supplementary material for: Modulation of occluding junctions alters the hematopoietic niche to trigger immune activation
Source: eLife. 2017 Aug 25;6:e28081. doi: 10.7554/eLife.28081 (PMC5597334; doi:10.7554/eLife.28081)
Supplement: Figure 4—source data 4. [file elife-28081-fig4-data4.xls]

## Sheet: Sheet1
		Crystal cell differentiation upon infection
				crystal cell differentiation index
			PcolGFP	B.subtilis	E.coli
			1.1	1.73	3.94
			0.8	1.74	6.11				Sucrose	B.subtilis	E.coli
			0.48	3.8	3.39				0.73	3.57	3.609
			0.3	4.34	4.65
			0.35	7.62	5.64
			0.85	5.32	2.4
			0.65	4.45	2.64
			0.54	3.81	3.47
			1.19	1.98	2.46
			1.05	1	1.39
		mean	0.731	3.579	3.609
		sd	0.317016	2.02236	1.50131
		sem	0.1002	0.6395	0.4748
			1.1	0.8	0.48	0.3	0.35	0.85	0.65	0.54	1.19	1.05
			1.73	1.74	3.8	4.34	7.62	5.32	4.45	3.81	1.98	1
			3.94	6.11	3.39	4.65	5.64	2.4	2.64	3.47	2.46	1.39
								t-Test: Two-Sample Assuming Unequal Variances
		t-Test: Two-Sample Assuming Unequal Variances
									Variable 1	Variable 2
			Variable 1	Variable 2				Mean	0.731	3.609
		Mean	0.731	3.579				Variance	0.100499	2.25392
		Variance	0.100499	4.08994				Observations	10	10
		Observations	10	10				Hypothesized Mean Difference	0
		Hypothesized Mean Difference	0					df	10
		df	9					t Stat	-5.93129
		t Stat	-4.39957					P(T<=t) one-tail	7.24163e-05
		P(T<=t) one-tail	0.000860729					t Critical one-tail	1.81246
		t Critical one-tail	1.83311					P(T<=t) two-tail	0.000144833
		P(T<=t) two-tail	0.00172146					t Critical two-tail	2.22814
		t Critical two-tail	2.26216
