# Supplementary material for: Modulation of occluding junctions alters the hematopoietic niche to trigger immune activation
Source: eLife. 2017 Aug 25;6:e28081. doi: 10.7554/eLife.28081 (PMC5597334; doi:10.7554/eLife.28081)
Supplement: Figure 5—source data 1. [file elife-28081-fig5-data1.xls]

## Sheet: Sheet1
	Dye assay upon infection (upon SJ over-expression)
	Pcolgfp suc	Pcolgfp b.sub	Pcolgfp e.coli	coraov suc	coraov b.sub	coraov e.coli	nrx4ov suc	nrx4ov b.sub	nrx4ov e.coli
	250	1150	1340	371	410	422	315	422	372.5	46.32
	275	1210	1425	380	270	381	302	418	386.2	158.03
	314	1368	1295	290	325	417	328	387	412	109.07
	289	1258	1590	320	368	420	346	350	364	45.43
	350	1110	1530	285	433	431	276	330	298.5	56.04
	260	1266	1478	260	397	378	323	298	313	51.84
	295	1367	1398	353	335	286	417	368	346	46.02
	328	1412	1220	356	422	316	402	405	388	39.48
	245	1538	1380	267	384	328	288	392	402	36.81
	190	1590	1424	280	291	336	312	379	375
Mean	279.6	1326.9	1408	316.2	363.5	371.5	330.9	374.9	365.72
SD	46.3254	158.038	109.074	45.4308	56.0461	51.8422	46.0276	39.4897	36.8115
	Pcolgfp suc	Pcolgfp b.sub	Pcolgfp e.coli	coraov suc	coraov b.sub	coraov e.coli	nrx4ov suc	nrx4ov b.sub	nrx4ov e.coli
	279.6	1326.9	1408	316.2	363.5	371.5	330.9	374.9	365.72
	250	275	314	289	350	260	295	328	245	190
	1150	1210	1368	1258	1110	1266	1367	1412	1538	1590
	1340	1425	1295	1590	1530	1478	1398	1220	1380	1424
	371	380	290	320	285	260	353	356	267	280
	410	270	325	368	433	397	335	422	384	291
	422	381	417	420	431	378	286	316	328	336
	315	302	328	346	276	323	417	402	288	312
	422	418	387	350	330	298	368	405	392	379
	372.5	386.2	412	364	298.5	313	346	388	402	375
t-Test: Two-Sample Assuming Unequal Variances						t-Test: Two-Sample Assuming Unequal Variances						t-Test: Two-Sample Assuming Unequal Variances
	Variable 1	Variable 2					Variable 1	Variable 2					Variable 1	Variable 2
Mean	1326.9	363.5				Mean	1326.9	374.9				Mean	1408	371.5
Variance	24976.1	3141.17				Variance	24976.1	1559.43				Variance	11897.1	2687.61
Observations	10	10				Observations	10	10				Observations	10	10
Hypothesized Mean Difference	0					Hypothesized Mean Difference	0					Hypothesized Mean Difference	0
df	11					df	10					df	13
t Stat	18.1685					t Stat	18.4809					t Stat	27.1406
P(T<=t) one-tail	7.46804e-10					P(T<=t) one-tail	2.31946e-09					P(T<=t) one-tail	3.91803e-13
t Critical one-tail	1.79588					t Critical one-tail	1.81246					t Critical one-tail	1.77093
P(T<=t) two-tail	1.49361e-09					P(T<=t) two-tail	4.63892e-09					P(T<=t) two-tail	7.83606e-13
t Critical two-tail	2.20099					t Critical two-tail	2.22814					t Critical two-tail	2.16037
t-Test: Two-Sample Assuming Unequal Variances					t-Test: Two-Sample Assuming Unequal Variances						t-Test: Two-Sample Assuming Unequal Variances
	Variable 1	Variable 2				Variable 1	Variable 2					Variable 1	Variable 2
Mean	1408	365.72			Mean	279.6	1326.9				Mean	279.6	1408
Variance	11897.1	1355.08			Variance	2146.04	24976.1				Variance	2146.04	11897.1
Observations	10	10			Observations	10	10				Observations	10	10
Hypothesized Mean Difference	0				Hypothesized Mean Difference	0					Hypothesized Mean Difference	0
df	11				df	11					df	12
t Stat	28.6313				t Stat	-20.1099					t Stat	-30.1114
P(T<=t) one-tail	5.53834e-12				P(T<=t) one-tail	2.51963e-10					P(T<=t) one-tail	5.63359e-13
t Critical one-tail	1.79588				t Critical one-tail	1.79588					t Critical one-tail	1.78229
P(T<=t) two-tail	1.10767e-11				P(T<=t) two-tail	5.03925e-10					P(T<=t) two-tail	1.12672e-12
t Critical two-tail	2.20099				t Critical two-tail	2.20099					t Critical two-tail	2.17881
t-Test: Two-Sample Assuming Unequal Variances					t-Test: Two-Sample Assuming Unequal Variances					t-Test: Two-Sample Assuming Unequal Variances
	Variable 1	Variable 2				Variable 1	Variable 2				Variable 1	Variable 2
Mean	316.2	363.5			Mean	316.2	371.5			Mean	330.9	374.9
Variance	2063.96	3141.17			Variance	2063.96	2687.61			Variance	2118.54	1559.43
Observations	10	10			Observations	10	10			Observations	10	10
Hypothesized Mean Difference	0				Hypothesized Mean Difference	0				Hypothesized Mean Difference	0
df	17				df	18				df	18
t Stat	-2.07322				t Stat	-2.53692				t Stat	-2.29429
P(T<=t) one-tail	0.0268323				P(T<=t) one-tail	0.0103283				P(T<=t) one-tail	0.0170095
t Critical one-tail	1.73961				t Critical one-tail	1.73406				t Critical one-tail	1.73406
P(T<=t) two-tail	0.0536645				P(T<=t) two-tail	0.0206566				P(T<=t) two-tail	0.0340189
t Critical two-tail	2.10982				t Critical two-tail	2.10092				t Critical two-tail	2.10092
t-Test: Two-Sample Assuming Unequal Variances
	Variable 1	Variable 2
Mean	330.9	365.72
Variance	2118.54	1355.08
Observations	10	10
Hypothesized Mean Difference	0
df	17
t Stat	-1.86826
P(T<=t) one-tail	0.0395301
t Critical one-tail	1.73961
P(T<=t) two-tail	0.0790602
t Critical two-tail	2.10982
