# Supplementary material for: Modulation of occluding junctions alters the hematopoietic niche to trigger immune activation
Source: eLife. 2017 Aug 25;6:e28081. doi: 10.7554/eLife.28081 (PMC5597334; doi:10.7554/eLife.28081)
Supplement: Figure 5—source data 2. [file elife-28081-fig5-data2.xls]

## Sheet: Sheet1
	Plasmatocyte counts upon infection (in SJ over-expression)
	PcolGFP suc	PcolGFP B.sub	PcolGFP E.coli	cora ov suc	coraov B.sub	coraov E.coli	NrxIVov suc	NrxIVov B.sub	NrxIVov E.coli
	2.8	8.4	6.8	1.55	1.06	0.96	0	0	0	0.413
	2.12	6.5	9.3	1.68	1.43	1.67				1.573
	1.95	7.2	8.2	1.675	1.95	2.1				1.365
	3.1	9.7	6.3	1.77	1.82	1.15				0.391
	2.68	8.1	7.27	2.55	1.61	1.25				0.363
	2.43	5.35	6.1	2.28	0.98	1.81				0.4209
	2.76	6.27	8.64	1.585	1.16	1.72				0
	2.9	10.21	9.7	1.476	1.72	2.21				0
	3.3	7.32	8.78	1.2	0.962	1.17				0
	2.7	6.2	9.65	1.81	1.56	1.49
Mean	2.674	7.525	8.074	1.7576	1.4252	1.553
SD	0.413527	1.57394	1.36539	0.391528	0.363164	0.420979	0	0	0
	PcolGFP suc	PcolGFP B.sub	PcolGFP E.coli	cora ov suc	coraov B.sub	coraov E.coli	NrxIVov suc	NrxIVov B.sub	NrxIVov E.coli
	2.674	7.525	8.074	1.75	1.425	1.553	0	0	0
	2.8	2.12	1.95	3.1	2.68	2.43	2.76	2.9	3.3	2.7
	8.4	6.5	7.2	9.7	8.1	5.35	6.27	10.21	7.32	6.2
	6.8	9.3	8.2	6.3	7.27	6.1	8.64	9.7	8.78	9.65
	1.55	1.68	1.675	1.77	2.55	2.28	1.585	1.476	1.2	1.81
	1.06	1.43	1.95	1.82	1.61	0.98	1.16	1.72	0.962	1.56
	0.96	1.67	2.1	1.15	1.25	1.81	1.72	2.21	1.17	1.49
	t-Test: Two-Sample Assuming Unequal Variances						t-Test: Two-Sample Assuming Unequal Variances								t-Test: Two-Sample Assuming Unequal Variances
		Variable 1	Variable 2					Variable 1	Variable 2							Variable 1	Variable 2
	Mean	1.7576	1.4252				Mean	1.7576	1.553						Mean	8.074	1.553
	Variance	0.153294	0.131888				Variance	0.153294	0.177223						Variance	1.86429	0.177223
	Observations	10	10				Observations	10	10						Observations	10	10
	Hypothesized Mean Difference	0					Hypothesized Mean Difference	0							Hypothesized Mean Difference	0
	df	18					df	18							df	11
	t Stat	1.96834					t Stat	1.1254							t Stat	14.4324
	P(T<=t) one-tail	0.0323135					P(T<=t) one-tail	0.1376							P(T<=t) one-tail	8.54677e-09
	t Critical one-tail	1.73406					t Critical one-tail	1.73406							t Critical one-tail	1.79588
	P(T<=t) two-tail	0.064627					P(T<=t) two-tail	0.275201							P(T<=t) two-tail	1.70935e-08
	t Critical two-tail	2.10092					t Critical two-tail	2.10092							t Critical two-tail	2.20099
	t-Test: Two-Sample Assuming Unequal Variances
		Variable 1	Variable 2
	Mean	7.525	1.4252
	Variance	2.47729	0.131888
	Observations	10	10
	Hypothesized Mean Difference	0
	df	10
	t Stat	11.9416
	P(T<=t) one-tail	1.52923e-07
	t Critical one-tail	1.81246
	P(T<=t) two-tail	3.05847e-07
	t Critical two-tail	2.22814

## Sheet: Sheet2
	cc
	PcolGFP suc	PcolGFP B.sub	PcolGFP E.coli	cora ov suc	coraov B.sub	coraov E.coli	NrxIVov suc	NrxIVov B.sub	NrxIVov E.coli
	1.36	3.4	5.22	0.97	1.13	1.72	1.5	1.45	1.53	0.2315
	1.43	4.25	3.89	1.14	1.06	1.54	1.13	1.82	2.3	0.673
	1.215	4.78	2.75	1.3	1.5	1.09	1.26	1.65	1.678	0.899
	1.18	3.78	3.12	0.86	1.21	1.43	1.975	2.1	1.5	0.19
	1.6	4.1	4.88	0.92	2.1	1.34	0.89	1.33	1.428	0.335
	0.98	3.6	5.34	1.23	1.35	1.29	1.22	1.42	1.86	0.197
	1.51	5.36	4.35	0.94	1.87	1.41	1.4	1.67	1.74	0.313
	0.87	3.24	3.66	0.726	1.7	1.65	0.92	1.21	1.88	0.28
	1.2	4.5	4.4	1.18	1.3	1.33	1.31	1.38	1.92	0.284
	1.42	3.56	5.1	1.22	1.37	1.18	1.47	1.24	1.35
	1.2765	4.057	4.271	1.0486	1.459	1.398	1.3075	1.527	1.7186
	0.231517	0.673928	0.89945	0.190104	0.335673	0.19736	0.313309	0.280953	0.28488
	PcolGFP suc	PcolGFP B.sub	PcolGFP E.coli	cora ov suc	coraov B.sub	coraov E.coli	NrxIVov suc	NrxIVov B.sub	NrxIVov E.coli
	1.276	4.057	4.271	1.04	1.459	1.398	1.307	1.527	1.718
	0.97	1.14	1.3	0.86	0.92	1.23	0.94	0.726	1.18	1.22	P<0.01
	1.13	1.06	1.5	1.21	2.1	1.35	1.87	1.7	1.3	1.37	P<0.01
	1.72	1.54	1.09	1.43	1.34	1.29	1.41	1.65	1.33	1.18
	1.5	1.13	1.26	1.975	0.89	1.22	1.4	0.92	1.31	1.47	ns
	1.45	1.82	1.65	2.1	1.33	1.42	1.67	1.21	1.38	1.24
	1.53	2.3	1.678	1.5	1.428	1.86	1.74	1.88	1.92	1.35	P<0.01
	t-Test: Two-Sample Assuming Unequal Variances
		Variable 1	Variable 2
	Mean	1.0486	1.459
	Variance	0.0361396	0.112677
	Observations	10	10
	Hypothesized Mean Difference	0
	df	14
	t Stat	-3.3642
	P(T<=t) one-tail	0.00231562
	t Critical one-tail	1.76131
	P(T<=t) two-tail	0.00463123
	t Critical two-tail	2.14479
t-Test: Two-Sample Assuming Unequal Variances
	Variable 1	Variable 2
Mean	1.0486	1.398
Variance	0.0361396	0.0389511
Observations	10	10
Hypothesized Mean Difference	0
df	18
t Stat	-4.03209
P(T<=t) one-tail	0.000390958
t Critical one-tail	1.73406
P(T<=t) two-tail	0.000781915
t Critical two-tail	2.10092
t-Test: Two-Sample Assuming Unequal Variances
	Variable 1	Variable 2
Mean	1.3075	1.527
Variance	0.0981625	0.0789344
Observations	10	10
Hypothesized Mean Difference	0
df	18
t Stat	-1.64941
P(T<=t) one-tail	0.0582026
t Critical one-tail	1.73406
P(T<=t) two-tail	0.116405
t Critical two-tail	2.10092
t-Test: Two-Sample Assuming Unequal Variances
	Variable 1	Variable 2
Mean	1.3075	1.7186
Variance	0.0981625	0.0811565
Observations	10	10
Hypothesized Mean Difference	0
df	18
t Stat	-3.06997
P(T<=t) one-tail	0.00329924
t Critical one-tail	1.73406
P(T<=t) two-tail	0.00659847
t Critical two-tail	2.10092
