# Supplementary material for: Modulation of occluding junctions alters the hematopoietic niche to trigger immune activation
Source: eLife. 2017 Aug 25;6:e28081. doi: 10.7554/eLife.28081 (PMC5597334; doi:10.7554/eLife.28081)
Supplement: Figure 7—source data 1. [file elife-28081-fig7-data1.xls]

## Sheet: Sheet1
		Dye assay quantitation upon localized, systemic and ubiquitous Toll and Imd activation
		PcolGFP	PcolGFP>Toll10b	PcolGFP>dRYBPRNAi	myoA1	myoA1>Toll10b	myoA1>dRYBPRNAi	wt	Toll10b	pirk
		150	1125	1265.9	289.5	1341	1466.1	244	1340.5	1358.2
		180	1185	1362.05	315.4	1387.9	1256.3	265.3	1317.52	1225.3
		200	1385	1393	343.9	1414.6	1413.7	205	1260	1209.4
		203.5	1360.5	1430.5	254	1466	1279.6	227	1420.4	1168.3
		174.6	1276.2	1410.5	302	1328.5	1388.67	265	1498.9	1316.2
		181.4	1341.3	1464.2	243	1214.4	1529.3	369.4	1267.3	1448.4
		211.7	1354.8	1348.8	232.1	1582.3	1249.4	320	1351.5	1168.3
		232.6	1287.3	1298.9	302	1310.5	1603	248.8	1302	1357.7
		227.3	1311.1	1258.7	274	1159.4	1288.2	310.2	1526.6	1123.7
		215.2	1338.5	1438.9	232.1	1686.4	1664	257.3	1135.1	1456.4
	Mean	197.63	1296.47	1367.14	278.8	1389.1	1413.83	271.2	1341.98	1283.19
	sem	8.181	26.17	23.13	12.04	50.3	47.23	15.42	36.85	38.03
			PcolGFP	PcolGFP>UASToll10b	PcolGFP>UASdRYBPRNAi	myoA1Gal4	myoA1Gal4>UASToll10b	myoA1Gal4>UASdRYBPRNAi	wt	Toll10b	pirk
			197.6	1296.4	1367.14	278.8	1389.1	1413.8	271.2	1341.9	1283.1
	150	180	200	203.5	174.6	181.4	211.7	232.6	227.3	215.2
	1125	1185	1385	1360.5	1276.2	1341.3	1354.8	1287.3	1311.1	1338.5
	1265.9	1362.05	1393	1430.5	1410.5	1464.2	1348.8	1298.9	1258.7	1438.9
	289.5	315.4	343.9	254	302	243	232.1	302	274	232.1
	1341	1387.9	1414.6	1466	1328.5	1214.4	1582.3	1310.5	1159.4	1686.4
	1466.1	1256.3	1413.7	1279.6	1388.67	1529.3	1249.4	1603	1288.2	1664
	244	265.3	205	227	265	369.4	320	248.8	310.2	257.3
	1340.5	1317.52	1260	1420.4	1498.9	1267.3	1351.5	1302	1526.6	1135.1
	1358.2	1225.3	1209.4	1168.3	1316.2	1448.4	1168.3	1357.7	1123.7	1456.4
t-Test: Two-Sample Assuming Unequal Variances					t-Test: Two-Sample Assuming Unequal Variances						t-Test: Two-Sample Assuming Unequal Variances					t-Test: Two-Sample Assuming Unequal Variances
	Variable 1	Variable 2				Variable 1	Variable 2					Variable 1	Variable 2				Variable 1	Variable 2
Mean	197.63	1296.47			Mean	197.63	1367.14				Mean	278.8	1389.1			Mean	278.8	1413.83
Variance	669.242	6850.28			Variance	669.242	5351.24				Variance	1450	25302.8			Variance	1450	22302.5
Observations	10	10			Observations	10	10				Observations	10	10			Observations	10	10
Hypothesized Mean Difference	0				Hypothesized Mean Difference	0					Hypothesized Mean Difference	0				Hypothesized Mean Difference	0
df	11				df	11					df	10				df	10
t Stat	-40.0718				t Stat	-47.6639					t Stat	-21.4662				t Stat	-23.289
P(T<=t) one-tail	1.41818e-13				P(T<=t) one-tail	2.12459e-14					P(T<=t) one-tail	5.36749e-10				P(T<=t) one-tail	2.41093e-10
t Critical one-tail	1.79588				t Critical one-tail	1.79588					t Critical one-tail	1.81246				t Critical one-tail	1.81246
P(T<=t) two-tail	2.83637e-13				P(T<=t) two-tail	4.24919e-14					P(T<=t) two-tail	1.0735e-09				P(T<=t) two-tail	4.82186e-10
t Critical two-tail	2.20099				t Critical two-tail	2.20099					t Critical two-tail	2.22814				t Critical two-tail	2.22814
t-Test: Two-Sample Assuming Unequal Variances					t-Test: Two-Sample Assuming Unequal Variances
	Variable 1	Variable 2				Variable 1	Variable 2
Mean	271.2	1341.98			Mean	271.2	1283.19
Variance	2376.65	13582.8			Variance	2376.65	14466.3
Observations	10	10			Observations	10	10
Hypothesized Mean Difference	0				Hypothesized Mean Difference	0
df	12				df	12
t Stat	-26.8036				t Stat	-24.6585
P(T<=t) one-tail	2.23343e-12				P(T<=t) one-tail	5.97683e-12
t Critical one-tail	1.78229				t Critical one-tail	1.78229
P(T<=t) two-tail	4.46686e-12				P(T<=t) two-tail	1.19537e-11
t Critical two-tail	2.17881				t Critical two-tail	2.17881
