# Supplementary material for: Modulation of occluding junctions alters the hematopoietic niche to trigger immune activation
Source: eLife. 2017 Aug 25;6:e28081. doi: 10.7554/eLife.28081 (PMC5597334; doi:10.7554/eLife.28081)
Supplement: Figure 9—source data 1. [file elife-28081-fig9-data1.xls]

## Sheet: Sheet1
		Plasmatocyte differentiation (wingless over-expression experiments in the niche in wild type and SJ depletion background)
	w1118; col-Gal4	col-gal4, uas-gfp; uas-lacz	col-gal4, uas-wg	col-gal4; corarnai, uas-lacz	col-gal4; nrx4rnai, uas-lacz	coraRNAi	nrxIVRNAi	coraRNAi; wg ov	nrxIVRNAi;wg ov
	2.78	3.7	2.1	11.2	12.68	17	12.9	2.3	2.5		sem
	2.1	2.85	1.98	10.56	12.2	19.1	11.9	1.9	4		0.1709
	3.32	2.32	2.25	12.34	11.8	10.05	13.5	2.2	1.4		0.215
	2.9	2.12	2.32	9.86	11.92	8.5	13.2	1.4	7.3		0.233
	3.1	2.56	2.12	10.44	10.45	12.1	19.2	2.4	7.1		0.484
	2.75	2.69	2.66	12.8	10.8	9.5	10.06	2.8	4.1		0.713
	3.45	3.5	1.88	13.1	11.3	9.3	11.1	1.4	4.1		1.167
	2.95	3.88	2.74	11.66	12.71	8.8	11.4	2.1	5.1		1.346
	3.6	3.74	2.8	11.4	12.65	13	10.5	2.8	4.8		0.284
	3.8	4.15	2.36	10.2	13.2	12.1	15.9	3.1	2.3		0.222
Mean	3.075	3.151	2.321	11.356	11.971	11.945	12.966	2.24	4.27
sd	0.493519	0.723071	0.320848	1.11856	0.896877	3.5937	2.77713	0.571936	1.93049
sem	0.1709	0.215	0.233	0.484	0.713	1.167	1.346	0.284	0.222
w1118; col-Gal4	col-gal4, uas-gfp; uas-lacz	col-gal4, uas-wg	col-gal4; corarnai, uas-lacz	col-gal4; nrx4rnai, uas-lacz	coraRNAi	nrxIVRNAi	coraRNAi; wg ov	nrxIVRNAi;wg ov
1.205	1.303	1.006	5.656	5.993	5.71	6.19	0.71	0.76
		2.78	2.1	3.32	2.9	3.1	2.75	3.45	2.95	3.6	3.8
		3.7	2.85	2.32	2.12	2.56	2.69	3.5	3.88	3.74	4.15
		2.1	1.98	2.25	2.32	2.12	2.66	1.88	2.74	2.8	2.36
		11.2	10.56	12.34	9.86	10.44	12.8	13.1	11.66	11.4	10.2
		12.68	12.2	11.8	11.92	10.45	10.8	11.3	12.71	12.65	13.2
		17	19.1	10.05	8.5	12.1	9.5	9.3	8.8	13	12.1
		12.9	11.9	13.5	13.2	19.2	10.06	11.1	11.4	10.5	15.9
		2.3	1.9	2.2	1.4	2.4	2.8	1.4	2.1	2.8	3.1
		2.5	4	1.4	7.3	7.1	4.1	4.1	5.1	4.8	2.3
							t-Test: Two-Sample Assuming Unequal Variances					t-Test: Two-Sample Assuming Unequal Variances
t-Test: Two-Sample Assuming Unequal Variances
								Variable 1	Variable 2				Variable 1	Variable 2
	Variable 1	Variable 2					Mean	12.966	4.27			Mean	11.945	11.356
Mean	11.945	2.24					Variance	7.71245	3.72678			Variance	12.9147	1.25118
Variance	12.9147	0.327111					Observations	10	10			Observations	10	10
Observations	10	10					Hypothesized Mean Difference	0				Hypothesized Mean Difference	0
Hypothesized Mean Difference	0						df	16				df	11
df	9						t Stat	8.13057				t Stat	0.494873
t Stat	8.43377						P(T<=t) one-tail	2.24601e-07				P(T<=t) one-tail	0.315213
P(T<=t) one-tail	7.24081e-06						t Critical one-tail	1.74588				t Critical one-tail	1.79588
t Critical one-tail	1.83311						P(T<=t) two-tail	4.49201e-07				P(T<=t) two-tail	0.630426
P(T<=t) two-tail	1.44816e-05						t Critical two-tail	2.11991				t Critical two-tail	2.20099
t Critical two-tail	2.26216
	t-Test: Two-Sample Assuming Unequal Variances						t-Test: Two-Sample Assuming Unequal Variances					t-Test: Two-Sample Assuming Unequal Variances
		Variable 1	Variable 2					Variable 1	Variable 2				Variable 1	Variable 2
	Mean	12.966	11.971				Mean	3.075	3.151			Mean	3.075	2.321
	Variance	7.71245	0.804388				Variance	0.243561	0.522832			Variance	0.243561	0.102943
	Observations	10	10				Observations	10	10			Observations	10	10
	Hypothesized Mean Difference	0					Hypothesized Mean Difference	0				Hypothesized Mean Difference	0
	df	11					df	16				df	15
	t Stat	1.07816					t Stat	-0.274529				t Stat	4.05058
	P(T<=t) one-tail	0.152018					P(T<=t) one-tail	0.393596				P(T<=t) one-tail	0.000523035
	t Critical one-tail	1.79588					t Critical one-tail	1.74588				t Critical one-tail	1.75305
	P(T<=t) two-tail	0.304037					P(T<=t) two-tail	0.787191				P(T<=t) two-tail	0.00104607
	t Critical two-tail	2.20099					t Critical two-tail	2.11991				t Critical two-tail	2.13145
