# Supplementary material for: Modulation of occluding junctions alters the hematopoietic niche to trigger immune activation
Source: eLife. 2017 Aug 25;6:e28081. doi: 10.7554/eLife.28081 (PMC5597334; doi:10.7554/eLife.28081)
Supplement: Figure 9—source data 2. [file elife-28081-fig9-data2.xls]

## Sheet: Sheet1
		Wingless average fluorescence intensity levels
		PcolGFP	coraRNAi	NrxIVRNAi	collier-Gal4>UAS-NrxIVmyc
		1150	525	480	1682		58.98
		1210	495	610	1733		76.58
		1285	635	638	1504		74.11
		1315	655	586	1574		168.9
		1178	560	712	1429
		1224	584	690	1292
		1190	705	655	1758
		1268	670	730	1280
		1316	722	646	1438
		1279	661	572	1550
	Mean	1241.5	621.2	631.9	1524
	SD	58.9807	76.5881	74.1117	168.904	w1118; collier-Gal4, UAS-GFP	collier-Gal4, UAS-GFP>coraRNAi	collier-Gal4, UAS-GFP>nrxIVRNAi	collier-Gal4, UAS-GFP>UAS-NrxIVmyc
						1241.5	621.2	631.9	1524
	1150	1210	1285	1315	1178	1224	1190	1268	1316	1279
	525	495	635	655	560	584	705	670	722	661
	480	610	638	586	712	690	655	730	646	572
	1682	1733	1504	1574	1429	1292	1758	1280	1438	1550
					t-Test: Two-Sample Assuming Unequal Variances							t-Test: Two-Sample Assuming Unequal Variances
t-Test: Two-Sample Assuming Unequal Variances
						Variable 1	Variable 2						Variable 1	Variable 2
	Variable 1	Variable 2			Mean	1241.5	631.9					Mean	1241.5	621.2
Mean	1241.5	1524			Variance	3478.72	5492.54					Variance	3478.72	5865.73
Variance	3478.72	28528.7			Observations	10	10					Observations	10	10
Observations	10	10			Hypothesized Mean Difference	0						Hypothesized Mean Difference	0
Hypothesized Mean Difference	0				df	17						df	17
df	11				t Stat	20.3525						t Stat	20.292
t Stat	-4.99337				P(T<=t) one-tail	1.12444e-13						P(T<=t) one-tail	1.18059e-13
P(T<=t) one-tail	0.000203382				t Critical one-tail	1.73961						t Critical one-tail	1.73961
t Critical one-tail	1.79588				P(T<=t) two-tail	2.24888e-13						P(T<=t) two-tail	2.36118e-13
P(T<=t) two-tail	0.000406765				t Critical two-tail	2.10982						t Critical two-tail	2.10982
t Critical two-tail	2.20099
